# Supplementary material for: Understanding nurses’ dual practice: a scoping review of what we know and what we still need to ask on nurses holding multiple jobs
Source: Hum Resour Health. 2018 Feb 22;16:14. doi: 10.1186/s12960-018-0276-x (PMC5824568; doi:10.1186/s12960-018-0276-x)
Supplement: Supplementary file 2 — Spreadsheet of papers reviewed. (XLSX 32 kb) [file 12960_2018_276_MOESM2_ESM.xlsx]

## Sheet: list-of-articles-included
Author and year	Full reference
Aiken et al (2007)	Aiken, Linda H. ‘U.S. Nurse Labor Market Dynamics Are Key to Global Nurse Sufficiency’. Health Services Research 42, no. 3 Pt 2 (June 2007): 1299–1320. https://doi.org/10.1111/j.1475-6773.2007.00714.x.
Alameddin et al (2006)	Alameddine, Mohamad, Audrey Laporte, Andrea Baumann, Linda O’Brien-Pallas, Barbara Mildon, and Raisa Deber. ‘“Stickiness” and “Inflow” as Proxy Measures of the Relative Attractiveness of Various Sub-Sectors of Nursing Employment’. Social Science & Medicine (1982) 63, no. 9 (November 2006): 2310–19. https://doi.org/10.1016/j.socscimed.2006.05.014.
Alameddin et al (2009)	Alameddine, Mohamad, Andrea Baumann, Audrey Laporte, Linda O’Brien-Pallas, Carey Levinton, Kanecy Onate, and Raisa Deber. ‘Career Trajectories of Nurses Leaving the Hospital Sector in Ontario, Canada (1993-2004)’. Journal of Advanced Nursing 65, no. 5 (May 2009): 1044–53.
Batch and Windsor (2014)	Batch, Mary, and Carol Windsor. ‘Nursing Casualization and Communication: A Critical Ethnography’. Journal of Advanced Nursing 71, no. 4 (April 2015): 870–80. https://doi.org/10.1111/jan.12557.
Batch et al (2009)	Batch, Mary, Alan Barnard, and Carol Windsor. ‘Who’s Talking? Communication and the Casual/Part-Time Nurse: A Literature Review’. Contemporary Nurse 33, no. 1 (August 2009): 20–29.
Bauman et al (2006)	Baumann, Andrea O., Jennifer M. Blythe, and Jane M. Underwood. ‘Surge Capacity and Casualization: Human Resource Issues in the Post-SARS Health System’. Canadian Journal of Public Health = Revue Canadienne De Sante Publique 97, no. 3 (June 2006): 230–32.
Bhengu (2001)	Bhengu, B. R. ‘Exploring the Critical Care Nurses’ Experiences Regarding Moonlighting’. Curationis 24, no. 2 (May 2001): 48–53.
Brown (1999)	Brown, Timothy. ‘Three Essays on the Labor Market for Nonphysician Clinicians’. University of California, Berkeley, 1999.
Creegan et al (2003)	Creegan, R., C. M. Duffield, and K. Forrester. ‘Casualisation of the Nursing Workforce in Australia: Driving Forces and Implications’, January 2003. https://opus.lib.uts.edu.au/handle/10453/4660.
Erasmus N. (2012)	Erasmus, Nicolette. ‘Slaves of the State - Medical Internship and Community Service in South Africa’. South African Medical Journal = Suid-Afrikaanse Tydskrif Vir Geneeskunde 102, no. 8 (5 June 2012): 655–58.
Farzianpour et al (2015)	Farzianpour, Fereshteh, Saeadeh Ansari Nosrati, Abbas Rahimi Foroushani, Fateme Hasanpour, Zahra Khakdel Jelodar, Meysam Safi Keykale, Mohammad Bakhtiari, and Niusha Shahidi Sadeghi. ‘Relationship Between Shift Work and Personality Traits of Nurses and Their Coping Strategies’. Global Journal of Health Science 8, no. 5 (28 September 2015): 166–74. https://doi.org/10.5539/gjhs.v8n5p166.
Feysia et al (2012)	Feysia, Berhanu, Christopher Herbst, and Wuleta Lemma. The Health Workforce in Ethiopia: Addressing the Remaining Challenges. World Bank Publications, 2012.
Gillen (2007)	Gillen, Sally. ‘Nurses Make Ends Meet through Extra Shifts and Payday Loans’. Nursing Standard 28, no. 11 (2013): 7–7. https://doi.org/10.7748/ns2013.11.28.11.7.s2.
Gillen (2013)	Gillen, Sally. ‘Nurses Make Ends Meet through Extra Shifts and Payday Loans’. Nursing Standard 28, no. 11 (2013): 7–7. https://doi.org/10.7748/ns2013.11.28.11.7.s2.
Gupta and Dal Poz (2009)	Gupta, Neeru, and Mario R Dal Poz. ‘Assessment of Human Resources for Health Using Cross-National Comparison of Facility Surveys in Six Countries’. Human Resources for Health 7 (12 March 2009): 22. https://doi.org/10.1186/1478-4491-7-22.
Hipple (2010)	Hipple, Steven H. ‘Multiple Jobholding over the Past Two Decades : Monthly Labor Review: U.S. Bureau of Labor Statistics’. Monthly Labor Review, 2010, 21–32.
Knauth (2007)	Knauth, Peter. ‘Extended Work Periods’. Industrial Health 45, no. 1 (January 2007): 125–36.
Lane et al (2010)	Lane, Christopher, Adélio Fernandes Antunes, and Mireille Kingma. ‘The Nursing Community, Macroeconomic and Public Finance Policies: Towards a Better Understanding’. Health Finncing for UHC. Geneva, Switzerland: The World Health Organization, 2009. http://www.who.int/health_financing/documents/cov-dp_e_09_02-nursing_macroeconomics/en/.
MacLeod et al (2017)	MacLeod, Martha L. P., Norma J. Stewart, Judith C. Kulig, Penny Anguish, Mary Ellen Andrews, Davina Banner, Leana Garraway, et al. ‘Nurses Who Work in Rural and Remote Communities in Canada: A National Survey’. Human Resources for Health 15 (23 May 2017): 34. https://doi.org/10.1186/s12960-017-0209-0.
McPake et al (2015)	McPake, Barbara, Giuliano Russo, David Hipgrave, Krishna Hort, and James Campbell. ‘Implications of Dual Practice for Universal Health Coverage’. Bulletin of the World Health Organization 94, no. 2 (2016): 142–46. https://doi.org/10.2471/BLT.14.151894.
Monteiro et al (2012)	Monteiro, Inês, Manuela de Santana Pi Chillida, and Luciana Contrera Moreno. ‘Work Ability among Nursing Personnel in Public Hospitals and Health Centers in Campinas--Brazil’. Work (Reading, Mass.) 41 Suppl 1 (2012): 316–19. https://doi.org/10.3233/WOR-2012-0176-316.
Montour et al (2009)	Montour, Amy, Andrea Baumann, Jennifer Blythe, and Mabel Hunsberger. ‘The Changing Nature of Nursing Work in Rural and Small Community Hospitals’. Rural and Remote Health 9, no. 1 (March 2009): 1089.
Paina et al (2014)	Paina, Ligia, Sara Bennett, Freddie Ssengooba, and David H. Peters. ‘Advancing the Application of Systems Thinking in Health: Exploring Dual Practice and Its Management in Kampala, Uganda’. Health Research Policy and Systems / BioMed Central 12 (2014): 41. https://doi.org/10.1186/1478-4505-12-41.
Portela et al (2004)	Portela, Luciana F., Lúcia Rotenberg, and William Waissmann. ‘Self-Reported Health and Sleep Complaints Among Nursing Personnel Working Under 12 h Night and Day Shifts’. Chronobiology International 21, no. 6 (1 January 2004): 859–70. https://doi.org/10.1081/CBI-200038513.
Ribeiro-Silva et al (2009)	Ribeiro-Silva, Flaviany, Lucia Rotenberg, Renata Elisa Soares, Joseane Pessanha, Flavia Leticia Ferreira, Paula Oliveira, Aline Silva-Costa, and Ana Amelia Benedito-Silva. ‘Sleep on the Job Partially Compensates for Sleep Loss in Night-Shift Nurses’. Chronobiology International 23, no. 6 (2006): 1389–99. https://doi.org/10.1080/07420520601091931.
Rispel and Blaauw (2015)	Rispel, Laetitia C., and Duane Blaauw. ‘The Health System Consequences of Agency Nursing and Moonlighting in South Africa’. Global Health Action 8 (2015): 26683.
Rispel et al (2011)	Rispel, Laetitia C., Sue Armstrong, Duane Blaauw, and Tobias Chirwa. ‘The Nature and Health System Consequences of Casualisation, Agency Nursing and Moonlighting in South Africa’. Technical report. Atlantic Philanthropies. Johannesbourgh, South Africa: Centre for Health Policy School of Public Health University of the Witwatersrand, Johannesburg, 2011.
Rispel et al (2014)	Rispel, Laetitia C., Duane Blaauw, Tobias Chirwa, and Katinka de Wet. ‘Factors Influencing Agency Nursing and Moonlighting among Nurses in South Africa’. Global Health Action 7 (18 March 2014). https://doi.org/10.3402/gha.v7.23585.
Salmon et al (2015)	Salmon, Marla E., and Akiko Maeda. ‘Investing in Nursing and Midwifery Enterprise to Empower Women and Strengthen Health Services and Systems: An Emerging Global Body of Work’. Nursing Outlook 64, no. 1 (February 2016): 7–16. https://doi.org/10.1016/j.outlook.2015.11.010.
Seleghim et al (2012)	Seleghim, Maycon Rogério, Mônica Augusta Mombelli, Magda Lúcia Félix de Oliveira, Maria Angélica Pagliarini Waidman, and Sonia Silva Marcon. ‘Stress Symptoms in Female Nurses Working in Emergency Rooms’. Revista Gaúcha de Enfermagem 33, no. 3 (September 2012): 165–73. https://doi.org/10.1590/S1983-14472012000300022.
Serra et al (2010)	Serra, Daniela, Pieter Serneels, and Magnus Lindelow. Discovering the Real World. Health Workers’ Career Choices and Early Work Experience in Ethiopia. World Bank Working Papers No.191, Africa Human Development Series. Washington: The World Bank, 2010. http://elibrary.worldbank.org/doi/abs/10.1596/978-0-8213-8356-8.
Stephenson (2017)	Stephenson, Jo. ‘Survey Paints Picture of “Demoralised, Overworked Nursing Staff”’. Nursing Times. Accessed 19 December 2017. https://www.nursingtimes.net/news/workforce/survey-paints-picture-of-demoralised-overworked-nursing-staff/7022484.article.
Tailby (2005)	Tailby, Stephanie. ‘Agency and Bank Nursing in the UK National Health Service’. Work, Employment and Society 19, no. 2 (1 June 2005): 369–89. https://doi.org/10.1177/0950017005053178.
Taylor et al (2004)	Taylor, Bev, and Jan Barling. ‘Identifying Sources and Effects of Carer Fatigue and Burnout for Mental Health Nurses: A Qualitative Approach’. International Journal of Mental Health Nursing 13, no. 2 (June 2004): 117–25. https://doi.org/10.1111/j.1445-8330.2004.imntaylorb.doc.x.
Wynton and A. Kleebauer (2016)	Wynton, Linsey, and Alistair Kleebauer. ‘Poor Pay Forcing Northern Ireland Nurses to Moonlight across the UK’. Nursing Standard (Royal College of Nursing (Great Britain): 1987) 30, no. 20 (13 January 2016): 10. https://doi.org/10.7748/ns.30.20.10.s9.

## Sheet: Dual_Nov_2017_Extra_3_combined
Title	Year	Authors	Journal
'It's a matter of your personality more than anything else': The experiences of seasonal workers regarding challenging behaviour in children	2017	L. Etheridge and H. Senior	Journal of Intellectual Disabilities
Sleep problems among Chinese clinical nurses working in general hospitals	2017	H. Dong, Q. Zhang, Z. Sun, F. Sang and Y. Xu	Occupational Medicine-Oxford
Working together: critical care nurses experiences of temporary staffing within Swedish health care: A qualitative study	2017	A. Berg Jansson and Å. Engström	Intensive and Critical Care Nursing
Psychiatric Nurses’ Emotional and Ethical Experiences Regarding Seclusion and Restraint	2016	H. Korkeila, A. M. Koivisto, E. Paavilainen and J. Kylmä	Issues in Mental Health Nursing
Associations between workers' health, and non-standard hours and insecurity: the case of home care workers in Ontario, Canada	2015	I. U. Zeytinoglu, M. Denton, J. Plenderleith and J. Chowhan	International Journal of Human Resource Management
Utilisation and costs of nursing agencies in the South African public health sector, 2005-2010	2015	L. C. Rispel and G. Angelides	Global Health Action
Exploring the characteristics of nursing agencies in South Africa	2015	O. I. Olojede and L. C. Rispel	Glob Health Action
Notification of juvenile violence in emergency services of the brazilian unified health system in feira de santana, Bahia, Brazil	2015	C. Dos Santos Souza, C. O. M. Costa, R. C. De Carvalho, T. M. De Araújo and T. R. M. Amaral	Revista Brasileira de Epidemiologia
Dealing with resistance in temporary agency nurses. The role of fear in identity-building processes	2015	M. Cicellin, M. Pezzillo Iacono, A. Berni and V. Esposito	J Health Organ Manag
Medication errors of nurses and factors in refusal to report medication errors among nurses in a teaching medical center of Iran in 2012	2014	D. Mostafaei, A. B. Marnani, H. M. Esfahani, F. Estebsari, S. Shahzaidi, E. Jamshidi and S. S. Aghamiri	Iranian Red Crescent Medical Journal
Drawn towards a career in elderly care medicine, but not till after medical school. Elderly care medicine as a career choice	2014	A. A. Meiboom, H. De Vries, B. A. M. Hesselink, C. M. P. M. Hertogh and F. Scheele	Tijdschrift voor Gerontologie en Geriatrie
Demand for temporary agency nurses and nursing shortages	2013	S. Seo and J. Spetz	Inquiry
When flexibility diversity becomes socially acceptable: The case of the French hospital industry	2011	P. Mossé, P. Méhaut, A. M. Arborio and L. Causse	Economic and Industrial Democracy
The role of professional identity commitment in understanding the relationship between casual employment and perceptions of career success	2011	B. C. Allen	Career Development International
Risk factors of paternal depression in the early postnatal period in Japan	2010	A. Nishimura and K. Ohashi	Nurs Health Sci
Impact of the prevention plan on employee health risk reduction	2010	R. Loeppke, D. W. Edington and S. Bég	Population Health Management
Casualized employment and turnover intention: Home care workers in Ontario, Canada	2009	I. U. Zeytinoglu, M. Denton, S. Davies and J. M. Plenderleith	Health Policy
Working at night and work ability among nursing personnel: when precarious employment makes the difference	2009	L. Rotenberg, R. H. Griep, F. M. Fischer, M. D. M. Fonseca and P. Landsbergis	International Archives of Occupational and Environmental Health
The changing nature of nursing work in rural and small community hospitals	2009	A. Montour, A. Baumann, J. Blythe and M. Hunsberger	Rural Remote Health
[Enriching one's practice with temporary employment]	2008	H. Cuvelier	Rev Infirm
Job stress and work attitudes between temporary and permanently employed nurses	2007	Y. J. Yvonne Yeh, J. J. Roger Ko, Y. S. Chang and C. H. Vivian Chen	Stress and Health
ICU nurse allocation in a cardiothoracic ICU: How many hands do we need?	2007	J. Scribante and S. Bhagwanjee	Southern African Journal of Critical Care
Student's perceptions of effective clinical teaching revisited	2007	C. Kelly	Nurse Educ Today
Predictors of sustained organizational commitment among nurses with temporary job contracts	2006	P. Jalonen, M. Virtanen, J. Vahtera, M. Elovainio and M. Kivimäki	Journal of Nursing Administration
Surge capacity and casualization: Human resource issues in the post-SARS health system	2006	A. O. Baumann, J. M. Blythe and J. M. Underwood	Canadian Journal of Public Health
E-orientation: a cyber approach to orienting per diem and temporary nurses	2005	C. M. Smith	J Nurses Staff Dev
[Paramedical temporary employment in 2003]	2003	E. Charles	Rev Infirm
Psychological and occupational predictive factors for back pain among employees of a university hospital in southern Spain	2000	I. Failde, J. L. Gonzalez, J. P. Novalbos, F. Casais, J. Marin and I. Elorza	Occupational Medicine-Oxford
Health care reform and the working time of hospital nurses in England and France	2000	J. Arrowsmith and P. Mossé	European Journal of Industrial Relations
Adjustment of status; certain H-1 nonimmigrant nurses--INS. Final rule	1992		Federal Register
Interim nursing management as temporary employment	1990	J. Mueller and R. Lavandero	Nurs Manage
Temporary employment	1981	A. Blankholm	Sykepleien
[Our priorities and temporary employment]	1981	H. Alsvag	Sykepleien

## Sheet: Data_extraction_table
Author and year	Magnitude	Forms	Specific settings/ examples	Drivers and motivations	Consequences for provision of services	Consequences for nurses’ health	Policy options
Aiken et al (2007)	Review of U.S. nurse supply and demand, trends in nurse immigration	Does not specifically examine dual practice
Alameddin et al (2006)	Examines impact of “just in time” staffing policy in Ontario, Canada-and SARS outbreak; interviews with 13 nurse administrators.	Examines impact of “just in time” staffing policy in Ontario, Canada- fewer full time staff, more part time and casual staff and agency staff.			Reports higher costs, reduced surge capacity	Fewer staff meant more overtime, stress related absenteeism increased.
Alameddin et al (2009)	Tracking of 201,463 nurses registered with College of Ontario, 1993-2004	Focus is on all types of job, career move. Limited examination of casualisation
Batch and Windsor (2014)	(a) Nursing has a higher rate of casualization than other professional and highly skilled workforces; (b) In Australia in 2011 in 2011, 47.5% of nurses were employed in non-standard work.	Causalisation of work	Australian hospitals	The causalisation movement aims at creating a more flexible and cheaper nurse workforce		Part-time and casual nurses are marginalised and excluded - called hole-pluggers; Marginalisation is accepted and normalised as a trade-off for the flexibility of this modality
Batch et al (2009)	In 2007 the percentage of part-time and casual nurses, that is those nurses working less than 35hrs per week, is 49.8% or almost half the nursing population			Inflexible rosters and unreasonable and unreasonable workloads, unavailability of full-time work in the area of choice. Lack of opportunities for professional development.	Casual and part-time workers seen as peripheral workforce; Marginalization of casual workers with consequences in career advancement; Implications in the quality of care due to lack of continuity of care and poor match of nurses’ skills to a workplace.
Bauman et al (2006)		‘Casualisation’of the health worforce in Ontario following the SARS epidemic.	Canada (Ontario).		Employing an unbalanced proportion of full time and casual nurses reduces flexibility of a hospital management, as these latter would be less available to cover for unforeseen needs
Bhengu (2001)	24 CC nurses, four focus groups, two hospitals in Durban, South Africa	Second jobs via agency working	Agency working in by public sector nurses in ICU, private sector hospitals	(a) Demand for CC nurses in the private hospitals; (b) Salaries failing to keep pace with inflation; (c ) Testing the experience of working in private sector	Reported that ICU s in private sector hospitals totally dependent on agency moonlighters-so staffed by “strangers”	(a) Reported tiredness, more likely to go off work sick; (b) Risk of “habitual moonlighting”; (c ) Psychsocial problems- different mix of ethnicity and language in private hospitals	Private sector hospitals should develop clinical guidelines to ensure safety in hands of “strangers”
Brown (1999)	In 1996, female registered nurses (RNs) were moonlighting at the rate of about 12%; female advanced practice nurses (APNs) were moonlighting at the rate of about 24%.	Second jobs held concurrently to the primary one; But also, second job not held continuously, i.e. irregularly.		On average, both RNs and APNs earn more on their second job then they do in their primary jobs. - The reason for the high rates of second-job holding among nurses relative to females in the general workforce appears to be a function of the nursing profession itself.	Those with second jobs tend, on average, to work fewer hours per week on their primary jobs than those who only hold one job.
Creegan et al (2003)	51.7% of nurses in Australia worked part-time in 1997	Casualisation and non-standard (part-time) forms of nursing profession	Australia and references to the UK	(a) Women are more likely to work on a part-time basis in Australia. Nursing is a predominantly female profession; (b) Casualization is particularly common among Licensed Practical Nurses (16.5%) (c) Casualization is more common for rural States (20%)	(a) The hiring hospital has little control on quality and qualifications of agency nurses, used to top-up existing staff; (b) The savings associated with casualization of nursing are potentially large	Casual nurses do not enjoy the same protection and support systems as permanent ones, nor opportunities for professional development	(a) Need to understand better the shifting workforce patterns to improve management and planning of the nursing workforce; (b) To date, efforts have been directed towards recruiting more nurses in permanent positions. Better management of the casual workforce segment could represent an alternative policy.
Erasmus N. (2012)	Broad focus on internship, unpaid overtime, moonlighting in SA. Mainly discusses doctors						Install electronic time recording in state hospitals, cessation of unpaid overtime, limits on medical intern shifts
Farzianpour et al (2015)	31% of nurses in private sector had a secondary job		Iran (Tehran private hospitals)
Feysia et al (2012)	Repeating findings from Serra et al (2010)			Repeating findings from Serra et al (2010)
Gillen (2007)	54% of 1200 Nursing Standards readers are doing extra-shifts; 10% is working outside the profession.			Pay bills and payday loans (the survey was conducted during the freezing of salaries between 2010 and 2012 UK economic hardship).	46% was thinking of leaving nursing profession
Gillen (2013)	1,200 nursing magazine readers. 54% took up extra nursing work, and 10% another on outside nursing		UK, among Nursing Standard readers	To complement insufficient public sector salary		45.8% declared considering leaving nursing because poor salary
Gupta and Dal Poz (2009)	(a) 11% Chad; (b) 7% Cote d'Ivoire; (c )26% Jamaica; (d) 1% Mozambique; (e) 0% Sri Lanka; (f) 7% Zimbabwe	Work at another location (health facility or other) in the previous month	In some cases it was reported that nurses did not have the right of private practice
Hipple (2010)	(a) Report on data from US Labor stats; (b) 6.3% of nurses had multiple jobs- higher for male nurses (9.5%, but small sample)	Second jobs were in or out of health sector			Discusses possible impact of nurses working 12 hour shifts- meaning they would have more free days for second jobs
Knauth (2007)	64% of nurses on 12h nightshift and 45% of those on dayshift had a secondary job	Extended periods of work across different professions (Moonlighting and secondary jobs)	Nurses in 12h night and day shifts		Increased sleepiness, difficulty of communicating with managers, increased risk of accidents driving home, increased absenteeism, reduced alertness
Lane et al (2010)	A broad based global review of nursing labour market, health systems and macroeconomic policy	Has a brief section on dual practice as a “coping mechanism”	“Dual practices range from legitimate private practice to moonlighting and informal charges for patients.”		Dual practice “often results in conflict of interest, idleness and absenteeism. However, not all dual practices can be considered as corrupt or leading to predatorial behaviour, but the impact of these practices can significantly undermine health services provision and public trust”.	“Abusive multi-employment can result in negative consequences for health workers as well as patients”.
MacLeod et al (2017)	1.1% of all nurses were in a job-share arrangement	(a) 15.8% of all nurses were in casual jobs; (b) Casualization is particularly common among Licensed Practical Nurses (16.5%); (c) Casualization is more common for rural States (20%)	Canada, nurse population living outside of the commuting zones of large urban centers and in the north of Canada				Causalisation of nursing in rural areas/communities is seen as a concern that should be addressed by Govt policies
McPake et al (2015)	Reports examples and prevalence of NDP for several countries from secondary sources	Unspecified multiple job-holding	Low- and middlle-income countries		Depending on its prevalence and regulation, dual practice can hamper attainment of UHC		Different regulatory option depending on country GDP, regulatory capacity, and definition of boundaries between public and private sectors
Monteiro et al (2012)	26% (out of 570 nursing workers)	Second job in the same branch	(a) Public hospitals and health centers in Brazil; (b) Nurses, nursing assistants and nursing auxiliaries
Montour et al (2009)			Rural and community hospitals in the Hamilton Niagara area (Canada and US)	It was reported by nurses that part-time and casual nurses often seek employment in other hospitals and long-term care homes to supplement their income	Employment in multiple organizations contributes to scheduling issues because casual nurses are unavailable to fill vacant shifts
Paina et al (2014)	Five public sector “facility case studies” in Kampala Uganda	“Additional jobs” (Focus was on all workers, not just nurses)			“Distinct challenges” for local management in trying to manage internal dual practice opportunities, linked to opportunities to be involved in externally funded research projects within the hospital.		Variation between national – formal policy and local- invormal policy on allowing workers to have second jobs.
Portela et al (2004)	41.5% of public hospital nurses were moonlighters	MJH was more common among nurses during 12h night or day shifts	Public hospitals in Brazil			Long (12h) night shifts found to have a less taxing effect on nurses health than day ones.
Ribeiro-Silva et al (2009)	0.33	Second job in another hospital or clinic	(a) Public hospitals Brazil; (b) Registered nurses and nursing assistants (N=144)		Those who had two jobs devoted more time to sleep/rest on the job	(a) The less time devoted to leisure and personal needs among those who work more associated with quality of daily life ; (b) Sleep on the job related to working on a second job. Those with two jobs had longer sleep episodes on the jobs (compared with those with a single job)
Rispel and Blaauw (2015)	40.7% reported agency or moonlighting in previous year	Agency/ moonlighting	80 hospitals in 4 provinces in SA. All nurses surveyed		11.9% of moonlighters had taken vacation to do agency work or moonlight; 9.8% reported conflicting schedules between primary and secondary jobs		Strong nurse leadership, effective management and consultation with front line nurses to counteract potential negative impacts of agency- moonlighting
Rispel et al (2011)	(a) 28.0% IC95 [24.2; 32.1] moonlighting last 12 months; (b) 42.2% moonlighting ever; (c) 37.8% IC95 [32.4;43.6] agency nursing; (d) 69.2% IC95 [64.1;73.8] had done overtime, moonlighting or agency nursing in the preceding year; (e) 18.5% reported all activities	Additional paid work (nursing or not nursing nature) in private health facility, another government health facility, insurance company private health laboratory or same health care facility excluding overtime		(a) Taking care of patients, opportunity to learn new nursing skills, relationship with co-workers, agency’s weekly pay, choice of unit/ward, job variety, do it for the money, stimulating work, quality of supervision, modern equipment/infrastructure, selection of working hours, money owed to revenue service; (b) Predictors: - having children province, sector (higher among private sector) - profes…			Management of moonlighting was considered an important policy priority by the SA Government which is reflected in the 5-year HRH strategy
Rispel et al (2014)	28% moonlighting (965/3442)	Additional paid work (nursing or not nursing nature) in private health facility, another government health facility, insurance company private health laboratory or same health care facility excluding overtime; Last 12 months	-	-	(a) Intention to leave was higher among moonlighters compared to non-moonlighters; (b) Planning to go overseas was higher in moonlighters compared to non-moonlighters; © Moonlighting is a predictor or intention to leave primary health job	-	-
Salmon et al (2015)	(a) Report of a Bellagio meeting “focusing on the largely overlooked area of investment in nursing and midwifery enterprise as a means for both empowering women and strengthening health systems and services”	Second jobs only indirectly examined in the broader context of the objectives of the meeting.
Seleghim et al (2012)		Simultaneous other job (not specified) for 15% of nurses (just 5…)	Paraná State, Brazil		No specific health consequence, but sample too small for significance
Serra et al (2010)	(a) 5% of all the nurses followed had secondary jobs; (b) Average days per week in secondary job was 9 days. Average hours per day was 9h (Vs 9.9 in primary)	87% of moonlighting nurses had a full-time job in public sector, and a secondary job in private/NGOs	Ethiopia, urban and rural areas	A greater proportion of nurses (50%) agreed in the second wave that you need to take up a secondary job to earn enough to support families
Stephenson (2017)	Of 900 nurses completing an online survey in the UK, 47% declared engaging in bank and/or agency shifts	Ban on agency shifts is introduced for nurses with a substantial NHS contract as a cost-containment strategy for public sector	The UK	Agency and bank shifts as a way to balance the cap on increasing public sector salaries
Tailby (2005)	(a) 80% (of 185000) nurses registered with NHS nurse banks had another nursing job; (b) 60% worked occasionally or regularly additional shifts paid at bank rates or agency rates	-	-	(a) Need for additional income; (b) Need to refresh/update skills ; (c) Attain a preferred pattern of working hours	-	-	-
Taylor et al (2004)		Causalisation of work	Mental health nurses in New South Wales, Australia			Causalisation of work was reported to be a major source of career fatigue and burnout
Wynton and A. Kleebauer (2016)		Agency nursing, other country (England, Scotland)		Economic- higher rate for single day fees than in home country of N Ireland

## Sheet: Excluded_(level_2)__reasons
Title	Year of Publication	Authors <many cells in blank>	Reasons (i.e. inclusion or exclusion criterion/criteria) for exclusion. <I did not find the info on that in the files I kept. Youd did the Level 2 screening, I guess you have that info>
Three essays on the labor market for nonphysician clinicians.	1999
Minimum wage.... exacerbates shortage of skilled nurse shortage, moonlighting and unemployment	2016	E. Schulte
Second job, big responsibility	2015	C. Shillabeer
Changing trends in newly licensed RNs	2014	C. T. Kovner, C. S. Brewer, F. Fatehi and C. Katigbak
Reducing worker fatigue to create a healthy work environment	2014	N. Blake, K. Gilmore, P. Dang and D. Villareal
Work-related stressors experienced by part-time clinical affiliate nursing faculty in baccalaureate education	2009	K. S. Whalen
The characteristics of nurses' and caregivers' behaviour in different clinical settings with special attention to burnout syndrome	2008	S. I. Pálfiné
Increasing illegal employment in nursing: affordable nursing care--possible without moonlighting?	2007	I. Rammoser
Changing continent	2006	C. Davis
Agency and bank nursing in the UK National Health Service	2005	S. Tailby
Self-reported musculoskeletal symptoms and observed risk factors in bareroot tree nurseries	2005	N. L. Howard, P. Spielholz, M. A. Cohen and B. Silverstein
Nurses taking second jobs	2004	V. Hoban
Working nine to five? Moonlighting midwives	2004	J. Hall
Manage moonlighting	1999	B. Brown
Doing more with less in nursing work: a review of the literature	1999	C. Bradley
VA nurses win the right to moonlight	1997	M. F. Miller
Nursing Faculty Practice: A Valid Sabbatical Request?	1994	R. R. N. P. Lassan
EC laws could affect moonlighting	1993	G. Scott
pound567 million - an 'unpaid subsidy'	1991
Hospital insurance unlikely to cover moonlighting nurses	1981	W. A. Regan
HANDS UP WHO THINKS NURSES ARE WELL PAID IN NORTHERN IRELAND...Wynton L, Kleebauer A Poor pay forcing Northern Ireland nurses to moonlight across the UK Nursing Standard 01-13-2016 p. 10	2016
Nurses make ends meet through extra shifts and payday loans.	2013
MOONLIGHTING RIFE IN SOUTH AFRICA.	2012
We have tightened our belts -- moonlighting will be next.	2008
Low pay forces seven out of 10 nurses to do a second job.	2006
D is for desperate.	2002
The Health Workforce in Ethiopia : Addressing the Remaining Challenges	2012	Feysia, Berhanu, Agnes Soucat, Christopher H. Herbst, and Wuleta Lemma
Nursing Care Quality: Comparison of Unit-Hired, Hospital Float Pool, and Agency Nurses	1996	Strzalka, A, D. S. Havens
One in Six Nurses Report Second Job	1991	Brindle, David
